# Supplementary material for: Chemiresistive sensor for breath frequency and ammonia concentration in exhaled gas over a PVA/PANI/CC composite film
Source: Royal Society of Chemistry journal article supplement (doi:10.1039/d3sd00067b), 2023-01-01
Supplement: d3sd00067b1.pdf [file d3sd00067b1.pdf]

## Supporting Information

### Chemiresistive sensor for breath frequency and ammonia concentration in exhaled gas over PVA/ PANI/CC composite film

Sandeep Kumar<sup>1,2</sup>, Chandra Shekhar Kushwaha<sup>2</sup>, Pratibha Singh<sup>2</sup>, Kritika Kanojia<sup>2</sup> and Saroj  
Kr Shukla<sup>2\*</sup>

<sup>1</sup>Department of chemistry, University of Delhi, Delhi-110007

<sup>2</sup>Department of Polymer Science, Bhaskaracharya College of Applied Sciences,  
University of Delhi, Delhi-110075, India

\*Corresponding author: Tel. 091-11-25087597; Fax: 091-11-25081015;

E-mail: [sarojshukla2003@yahoo.co.in](mailto:sarojshukla2003@yahoo.co.in)

**Figure S1.** Optical photographs of (a) solution of PVA-PANI-CC composites, (b) fabricated PVA-PANI-CC/ITO coated glass film, (c) fabrication of film into the mask (d) complete breath monitoring setup (e) humidity sensor setup.

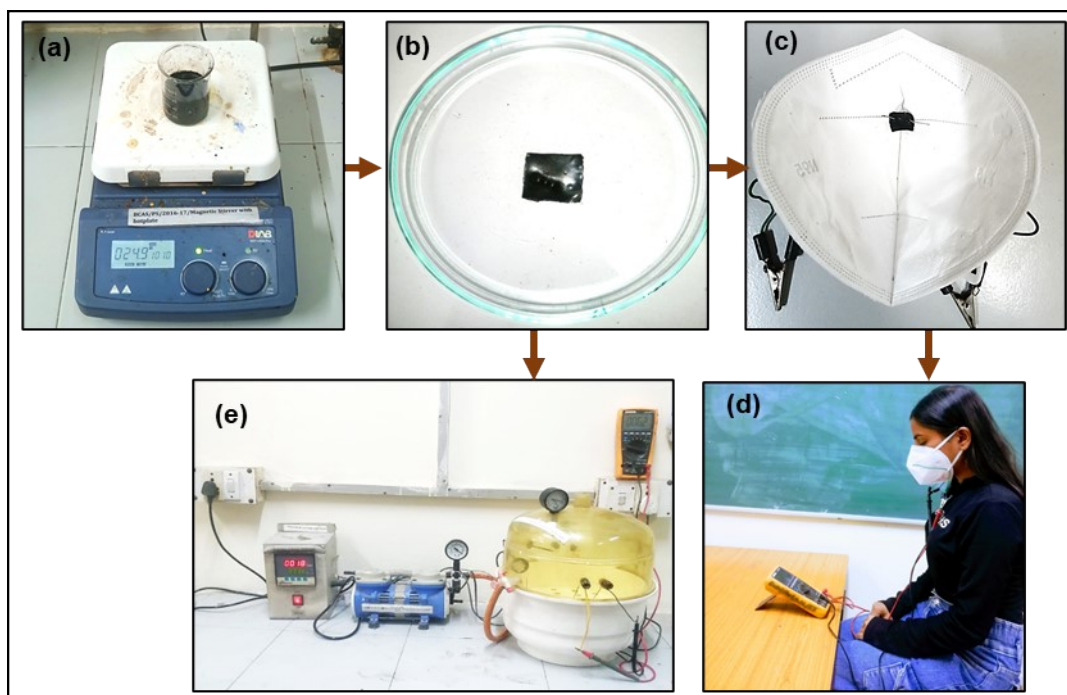

**Figure S2.** The biodegradability measurement of (a) prepared sample for the burial test (b) buried sample in soil (c) degraded sample over time.

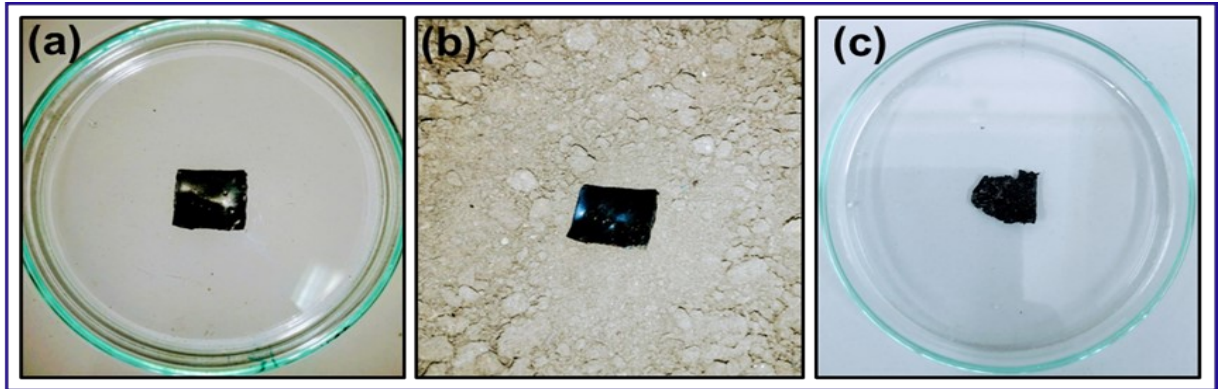

**Figure S3.** The flame-retardant measurements of (a) PVA-PANI-CC composite coated wooden specimen (b) burning tests of developed PVA-PANI-CC composites (c) residue after burning test.

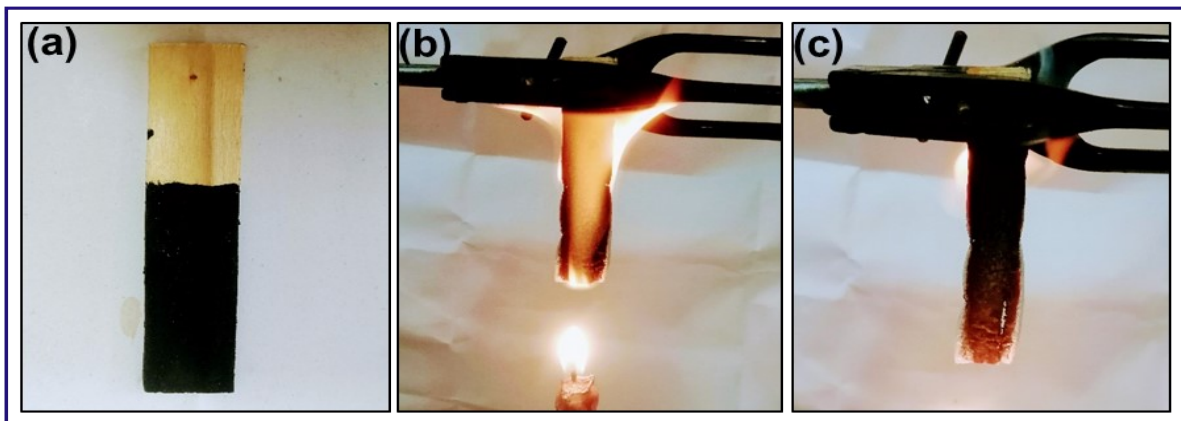

The results obtained from Fig. S3 are revealing significant improvement in flame retardancy of PVA from V0 to V2 after addition of china-clay and PANI. It is due to the evolution of synergetic packed structure along with better water adsorption and char formation nature. The reduced burning nature further lowers the burning rate by 55 % of its original values<sup>1</sup>.

**Figure S4:** (a) Change in resistance of PVA-PANI-CC against relative humidity, (b) Change in resistance of PVA-PANI-CC with time at 80% RH.

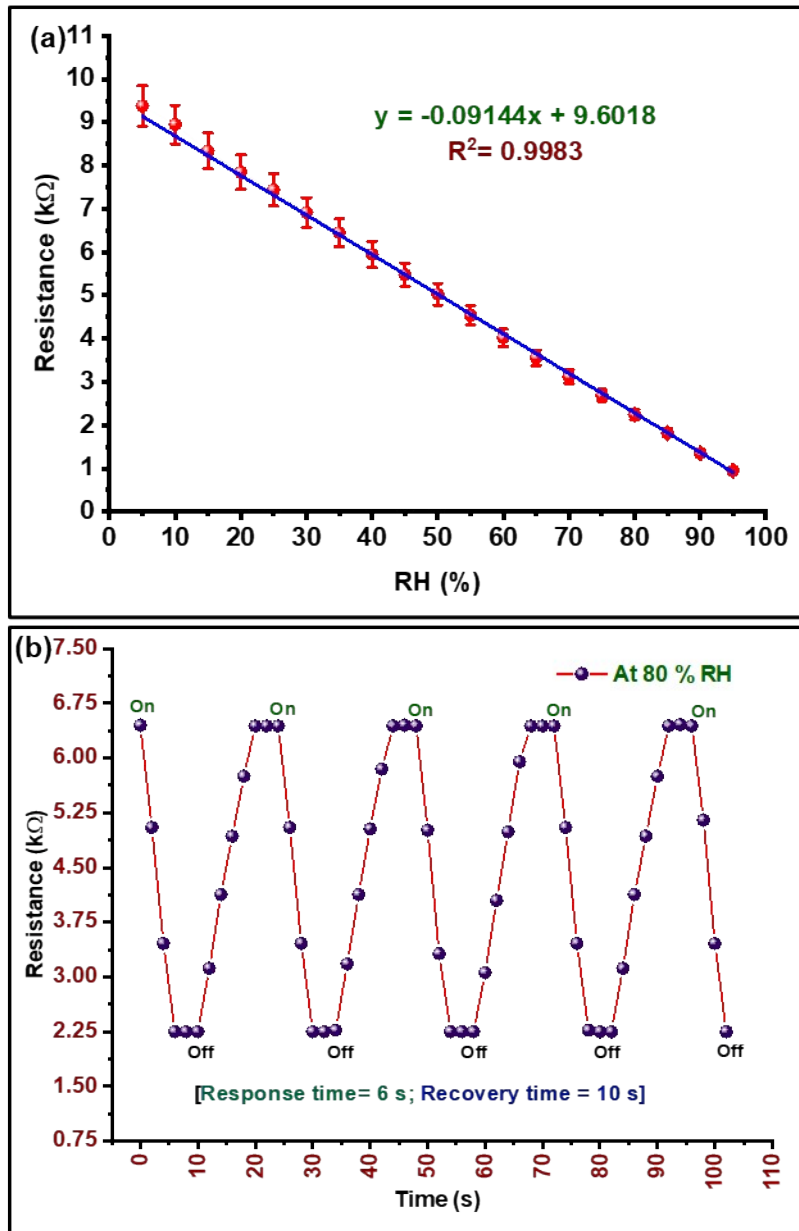

**Figure S5.** Variation in the sensing response of the PANI-PVA-CC based sensor with interval of 10 Days (Stability curve).

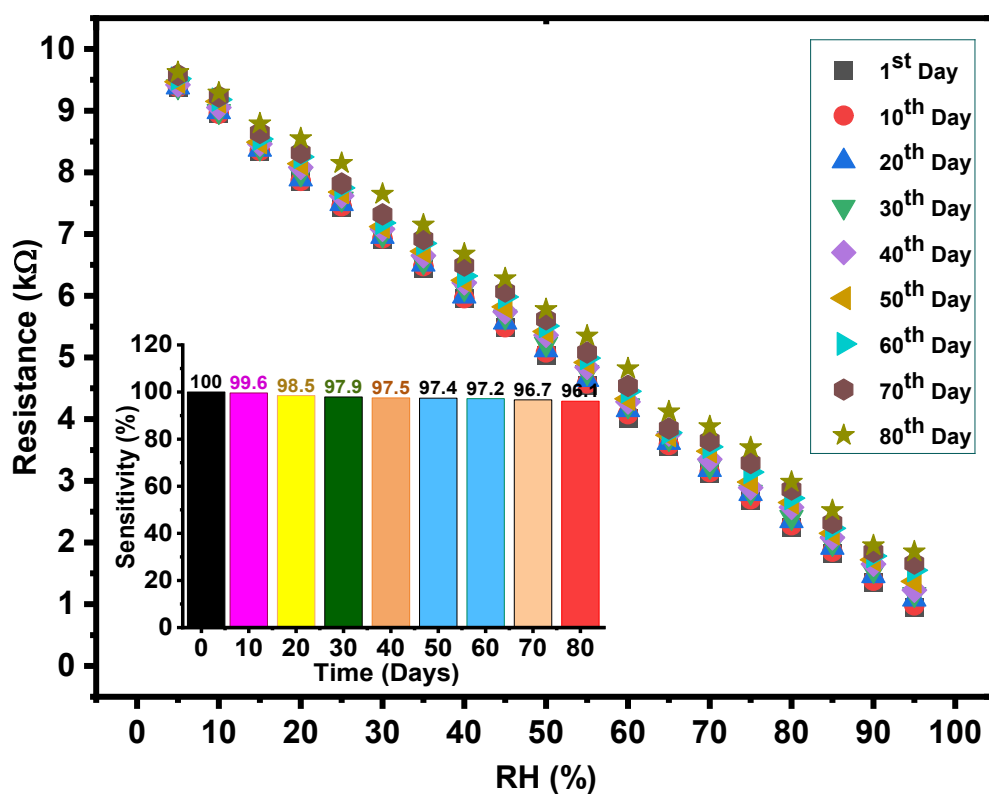

**Table S1:** The FTIR peaks along with their respective functional groups.

| S. N. | Functional groups                       | PVA (cm <sup>-1</sup> ) | PANI (cm <sup>-1</sup> ) | PVA-PANI-China clay (cm <sup>-1</sup> ) |
|-------|-----------------------------------------|-------------------------|--------------------------|-----------------------------------------|
| 1     | N-H/OH Stretching                       | 3341                    | 3416                     | 3412                                    |
| 2     | C-H stretching                          | 2902                    | 2854, 2899               | 2876, 2960                              |
| 3     | C=O Stretching                          | -                       | -                        | 1716                                    |
| 4     | C – C Stretching                        | 1634                    | 1602                     | 1607                                    |
| 5     | Quinonoid (Q) ring stretching           | -                       | 1505                     | 1518                                    |
| 6     | Benzenoid (B) ring stretching           | -                       | 1452                     | 1458                                    |
| 7     | $\nu$ (C–N) of secondary aromatic amine | -                       | 1302                     | 1297                                    |
| 8     | $\nu$ (C–N) in BBB unit                 | -                       | -                        | 1235                                    |
| 9     | N=Q=N/ $\delta$ (C–H) vibrations        | -                       | 1161                     | 1174                                    |
| 10    | B–NH–B/ $\delta$ (C–H) vibrations       | -                       | 1090 ( <i>l</i> )        | 1109 ( <i>s</i> )                       |
| 11    | C-O Stretching                          | 1042                    | -                        | 1030                                    |
| 12    | C-H Bending                             | -                       | 743                      | 745                                     |

**Table S2:** XRD derived parameters

| S. No. | Samples     | XRD Parameters      |             |                     |
|--------|-------------|---------------------|-------------|---------------------|
|        |             | Angle (2 $\theta$ ) | Plane (hkl) | <i>d</i> -value (Å) |
| 1.     | PVA         | 19.7°               | (101)       | 4.53                |
|        |             | 22.6°               | (200)       | 3.91                |
|        |             | 40.5°               | (111)       | 2.21                |
| 2.     | PANI        | 20.2°               | (100)       | 4.31                |
|        |             | 25.5°               | (110)       | 3.42                |
| 3.     | PVA-PANI-CC | 10.1°               | (011)       | 9.78                |
|        |             | 18.5°               | (101)       | 4.77                |
|        |             | 20.5°               | (100)       | 4.31                |
|        |             | 25.5°               | (110)       | 3.42                |
|        |             | 35.9°               | (211)       | 2.38                |
|        |             | 38.5°               | (220)       | 2.21                |
|        |             | 55.2°               | (301)       | 1.88                |

**Table S3:** TG curve derived parameters

| S. No. | Samples     | TG Analysis |                        |             |
|--------|-------------|-------------|------------------------|-------------|
|        |             | Steps       | Temperature range (°C) | Weight loss |
| 1.     | PVA         | 1           | 25 – 100               | ~10 %       |
|        |             | 2           | 100 – 310              | ~ 5 %       |
|        |             | 3           | 310 – 400              | ~75 %       |
| 2.     | PANI        | 1           | 25 – 200               | ~10 %       |
|        |             | 2           | 200 – 350              | ~35 %       |
| 3.     | PVA-PANI-CC | 1           | 25 – 100               | ~10 %       |
|        |             | 2           | 100 – 300              | ~ 10 %      |
|        |             | 3           | 310 – 500              | ~10%        |

**Table S4.** Flame-retardant behaviour of constituent and PVA-PANI-CC.

| S. N. | Sample | Burning time (s) | Ignition time (s) | Ash contents (%) | Observation |
|-------|--------|------------------|-------------------|------------------|-------------|
|-------|--------|------------------|-------------------|------------------|-------------|

|    |                                      |    |    |       |                                                      |
|----|--------------------------------------|----|----|-------|------------------------------------------------------|
| 1. | PVA Coated strip (S1)                | 50 | 20 | 18.51 | Burn with high flame and Bubbles seen while burning. |
| 2. | PVA-PANI Coted strip (S2)            | 75 | 30 | 30.78 | Slow burning flame with dripping                     |
| 3. | PVA-PANI-china-clay Coted strip (S3) | 90 | 55 | 36.10 | Slow burning flame with dripping                     |

## References

1. A. Kumar, S. Kumar and B. P. Tripathi, Polydopamine primed phosphorylated sepiolite-polypropylene nanocomposite with enhanced thermal, rheological, and flame retardant properties, *Polym. Degrad. Stab.*, 2022, **202**, 110005.
